# Supplementary material for: Organometallic rhodium(iii) and iridium(iii) cyclopentadienyl complexes with curcumin and bisdemethoxycurcumin co-ligands
Source: Royal Society of Chemistry journal article supplement (doi:10.1039/c5dt03037d), 2015-01-01

Electronic Supplementary Material (ESI) for Dalton Transactions.  
This journal is © The Royal Society of Chemistry 2015

## Supplementary Information

### Organometallic Rhodium(III) and Iridium(III) Cyclopentadienyl Complexes with Curcumin and Bisdemethoxycurcumin Co-ligands.

Riccardo Pettinari,<sup>a\*</sup> Fabio Marchetti,<sup>b</sup> Claudio Pettinari,<sup>a</sup> Francesca Condello,<sup>a</sup> Agnese Petrini,<sup>a</sup> Rosario Scopelliti,<sup>c</sup> Tina Riedel<sup>c</sup> and Paul J. Dyson.<sup>c\*</sup>

[a] School of Pharmacy, University of Camerino, via S. Agostino 1, 62032 Camerino MC, Italy. E-mail: riccardo.pettinari@unicam.it; Tel: +39-0737-632338.

[b] School of Science and Technology, University of Camerino, via S. Agostino 1, 62032 Camerino MC, Italy.

[c] Institute of Chemical Sciences and Engineering, Swiss Federal Institute of Technology (EPFL), CH-1015 Lausanne, Switzerland. E-mail: paul.dyson@epfl.ch; Fax: +41-21-6939885; Tel: +41-21-6939854.

#### Table of content

|                                                               |    |
|---------------------------------------------------------------|----|
| Crystallographic .....                                        | S2 |
| Relevant <sup>1</sup> H and <sup>31</sup> P NMR spectra ..... | S3 |

## Crystallographic appendix

Table S1. Crystal Data and Details of the Structure Determination for **5**, **6** and **8**.

|                                                             | <b>5</b>                                                                          | <b>6</b>                                                                          | <b>8</b>                                                                          |
|-------------------------------------------------------------|-----------------------------------------------------------------------------------|-----------------------------------------------------------------------------------|-----------------------------------------------------------------------------------|
| Chemical formula                                            | C <sub>38</sub> H <sub>46</sub> F <sub>3</sub> N <sub>3</sub> O <sub>9</sub> PRhS | C <sub>36</sub> H <sub>42</sub> F <sub>3</sub> N <sub>3</sub> O <sub>7</sub> PRhS | C <sub>36</sub> H <sub>42</sub> F <sub>3</sub> IrN <sub>3</sub> O <sub>7</sub> PS |
| Formula weight                                              | 911.72                                                                            | 851.67                                                                            | 940.96                                                                            |
| Crystal system                                              | triclinic                                                                         | triclinic                                                                         | triclinic                                                                         |
| Space group                                                 | <i>P</i> -1                                                                       | <i>P</i> -1                                                                       | <i>P</i> -1                                                                       |
| <i>a</i> (Å)                                                | 9.6907(5)                                                                         | 10.7522(8)                                                                        | 10.7256(7)                                                                        |
| <i>b</i> (Å)                                                | 13.8415(16)                                                                       | 12.8029(6)                                                                        | 12.7714(14)                                                                       |
| <i>c</i> (Å)                                                | 16.1294(16)                                                                       | 14.1428(16)                                                                       | 14.1260(17)                                                                       |
| $\alpha$ (°)                                                | 71.423(8)                                                                         | 98.723(7)                                                                         | 98.921(10)                                                                        |
| $\beta$ (°)                                                 | 88.332(7)                                                                         | 94.670(7)                                                                         | 94.649(9)                                                                         |
| $\gamma$ (°)                                                | 76.420(6)                                                                         | 106.621(6)                                                                        | 106.740(7)                                                                        |
| Volume (Å <sup>3</sup> )                                    | 1991.0(3)                                                                         | 1827.9(3)                                                                         | 1814.3(3)                                                                         |
| <i>Z</i>                                                    | 2                                                                                 | 2                                                                                 | 2                                                                                 |
| <i>D</i> <sub>calc</sub> (g cm <sup>-3</sup> )              | 1.521                                                                             | 1.547                                                                             | 1.722                                                                             |
| <i>F</i> (000)                                              | 940                                                                               | 876                                                                               | 940                                                                               |
| $\mu$ (mm <sup>-1</sup> )                                   | 0.593                                                                             | 0.636                                                                             | 3.850                                                                             |
| Temp (K)                                                    | 100(2)                                                                            | 100(2)                                                                            | 100(2)                                                                            |
| Wavelength (Å)                                              | 0.71073                                                                           | 0.71073                                                                           | 0.71073                                                                           |
| Measured reflections                                        | 41149                                                                             | 26911                                                                             | 29732                                                                             |
| Unique reflections                                          | 13758                                                                             | 8362                                                                              | 10271                                                                             |
| Unique reflections                                          | 11322                                                                             | 6774                                                                              | 8726                                                                              |
| [ <i>I</i> > 2 $\sigma$ ( <i>I</i> )]                       |                                                                                   |                                                                                   |                                                                                   |
| Data / parameters                                           | 13758 / 513                                                                       | 8362 / 506                                                                        | 10271 / 511                                                                       |
| <i>R</i> <sup>a</sup> [ <i>I</i> > 2 $\sigma$ ( <i>I</i> )] | 0.0383                                                                            | 0.0463                                                                            | 0.0468                                                                            |
| <i>wR</i> <sub>2</sub> <sup>a</sup> (all data)              | 0.0840                                                                            | 0.1018                                                                            | 0.1297                                                                            |
| GoF <sup>b</sup>                                            | 1.103                                                                             | 1.136                                                                             | 1.062                                                                             |

<sup>a</sup>  $R = \sum |F_o| - |F_c| / \sum |F_o|$ ,  $wR_2 = \{\sum [w(F_o^2 - F_c^2)^2] / \sum [w(F_o^2)^2]\}^{1/2}$ ; <sup>b</sup> GoF =  $\{\sum [w(F_o^2 - F_c^2)^2] / (n-p)\}^{1/2}$  where *n* is the number of data and *p* is the number of parameters refined.

Crystallographic data for the structures reported in this paper have been deposited with the Cambridge Crystallographic Data Centre as a supplementary publication no. CCDC 1412115-1412117.

Copies of the data can be obtained free of charge on application to CCDC, 12

Union Road, Cambridge CB21EZ, UK (fax: +(44)1223-336-033; email: [deposit@ccdc.cam.ac.uk](mailto:deposit@ccdc.cam.ac.uk)).

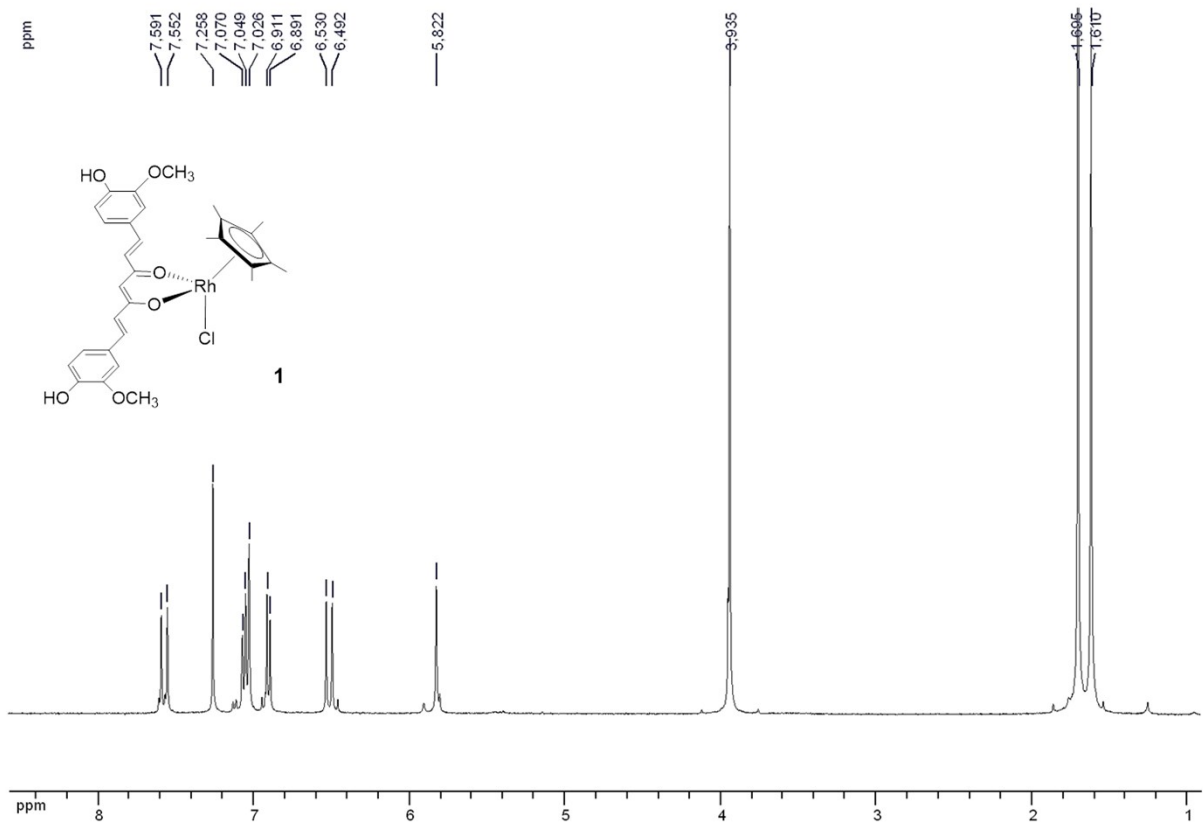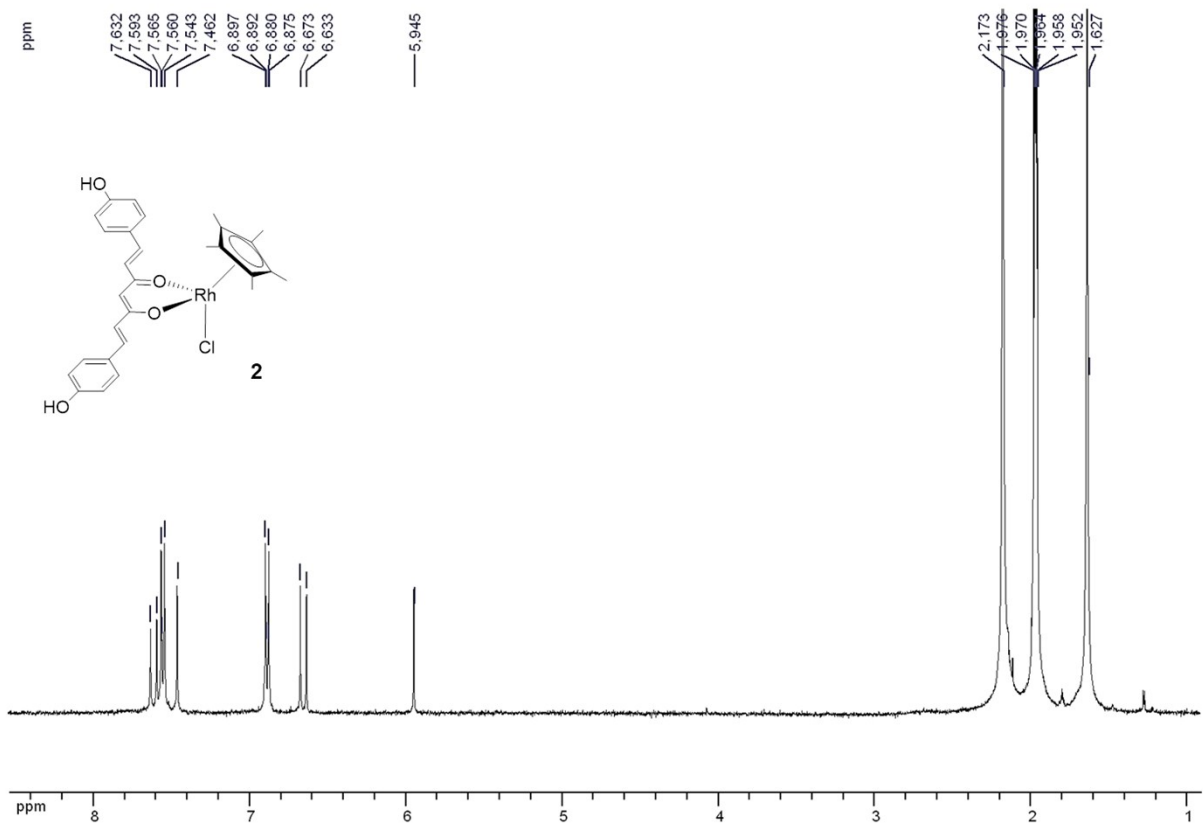

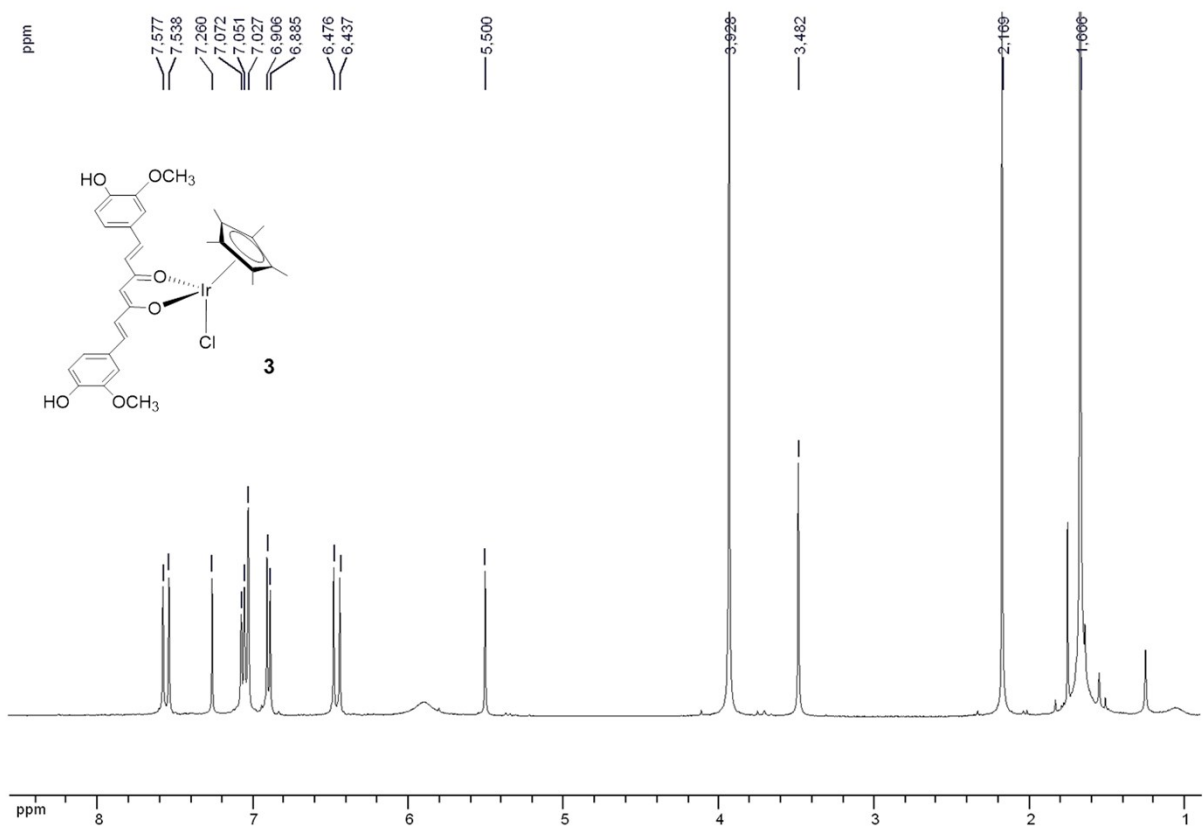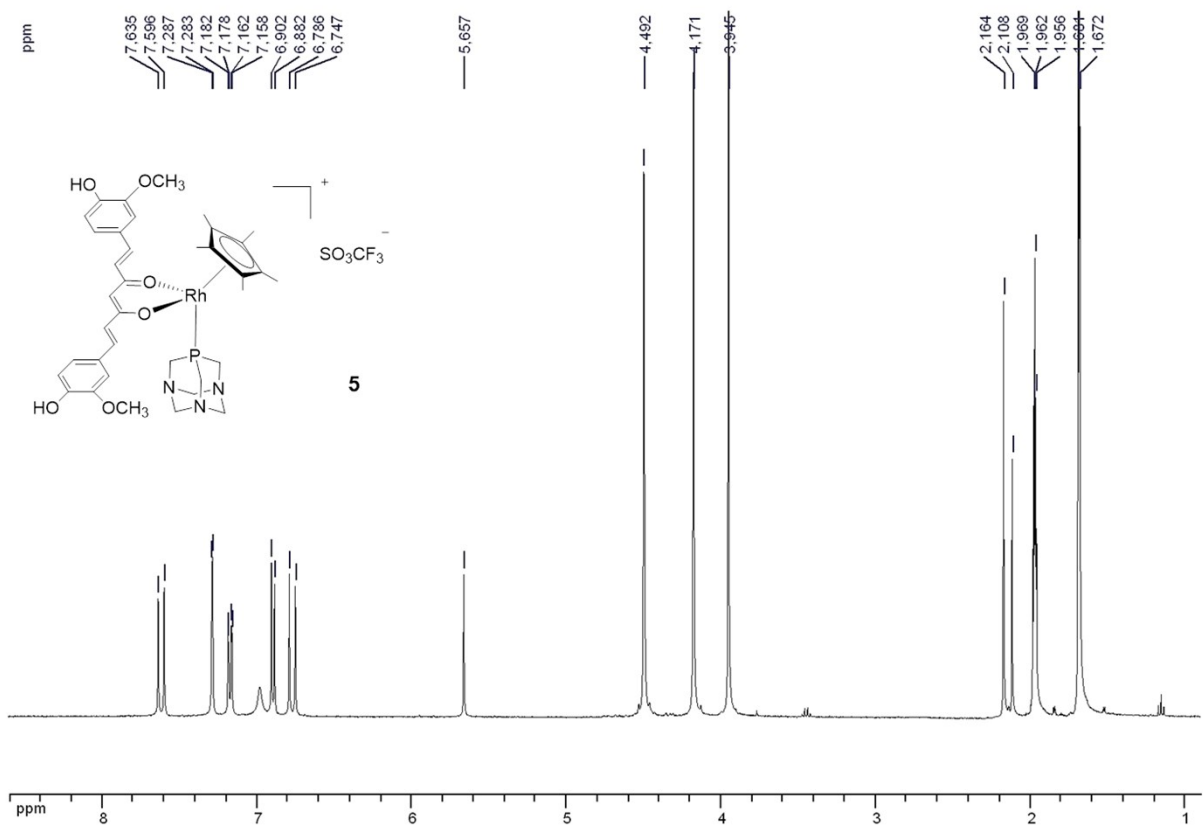

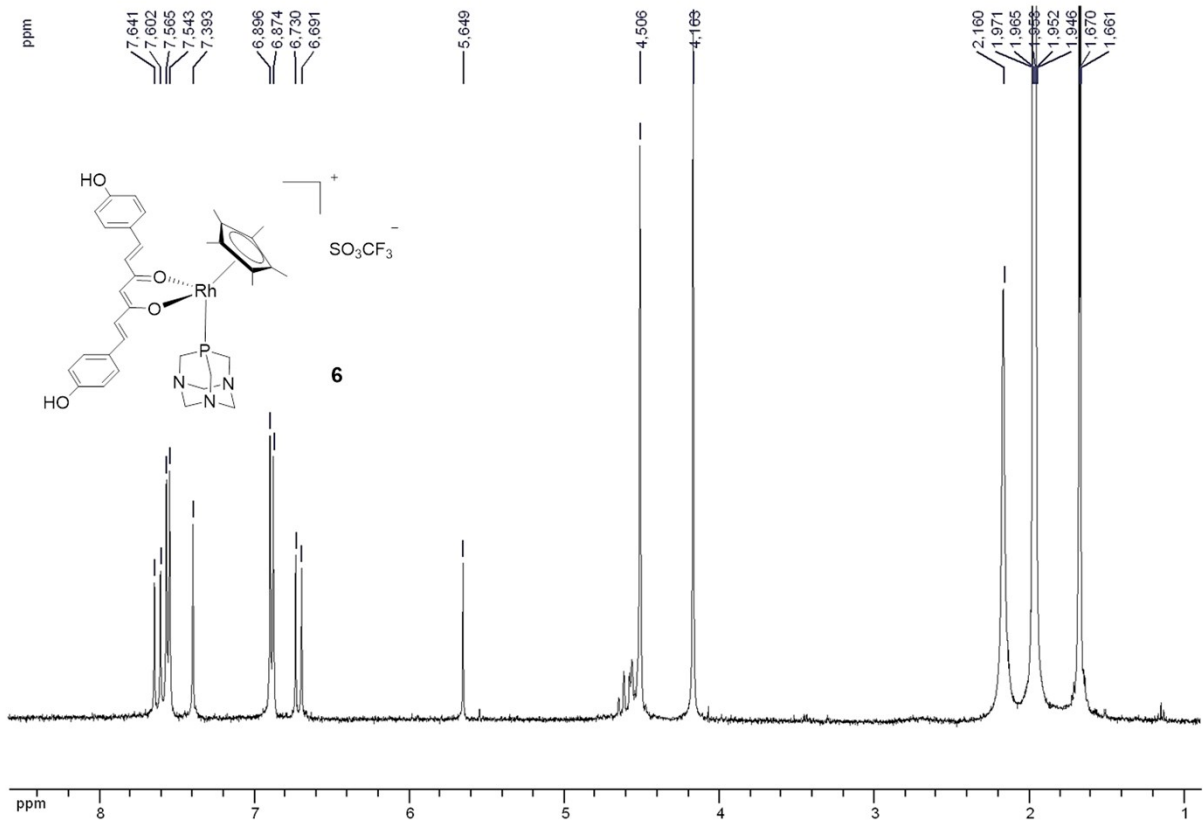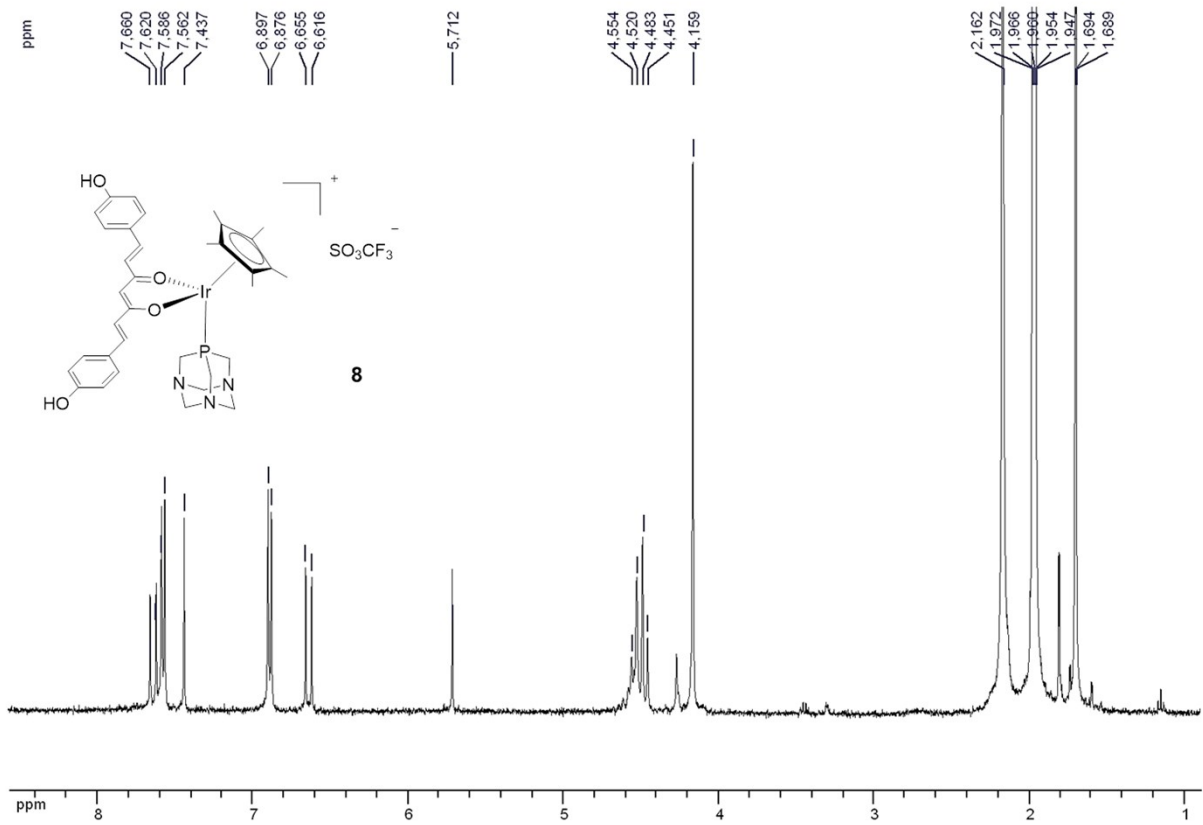

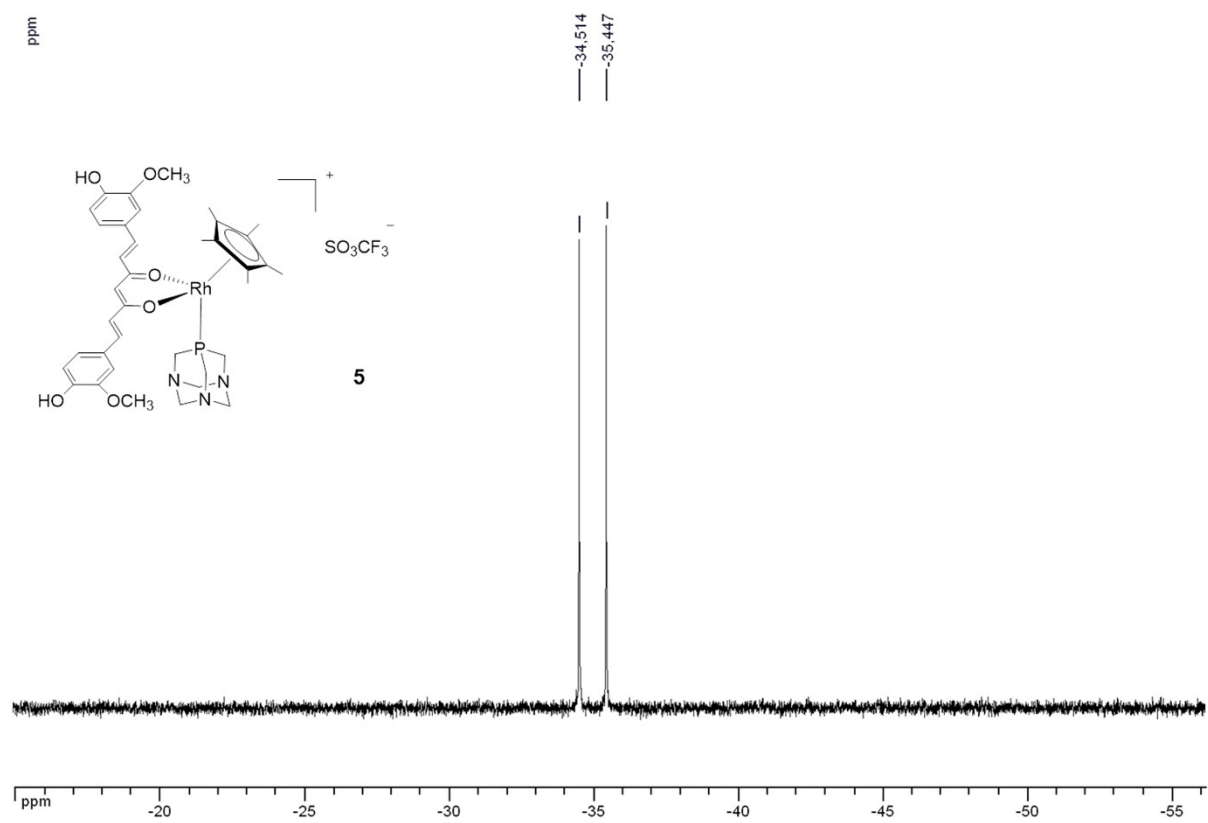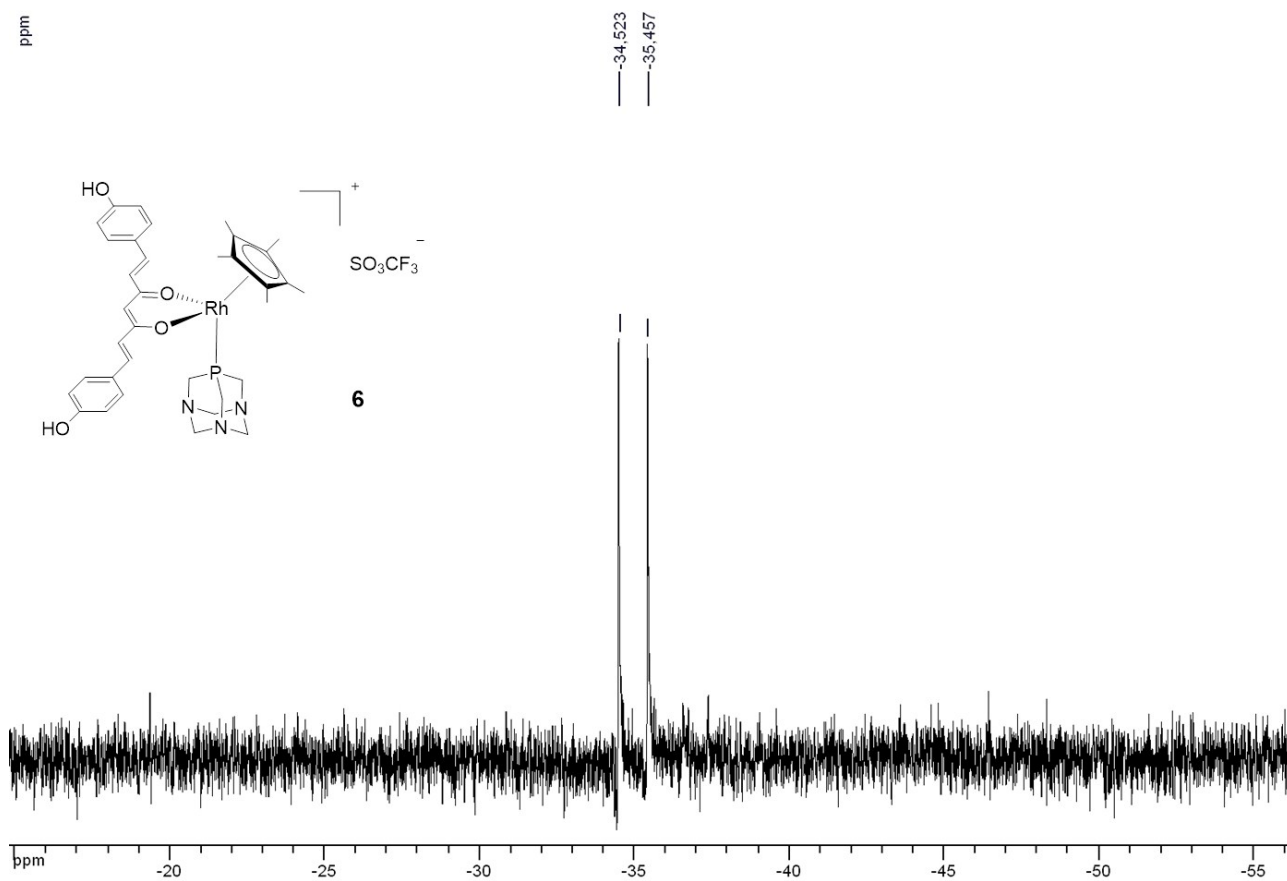

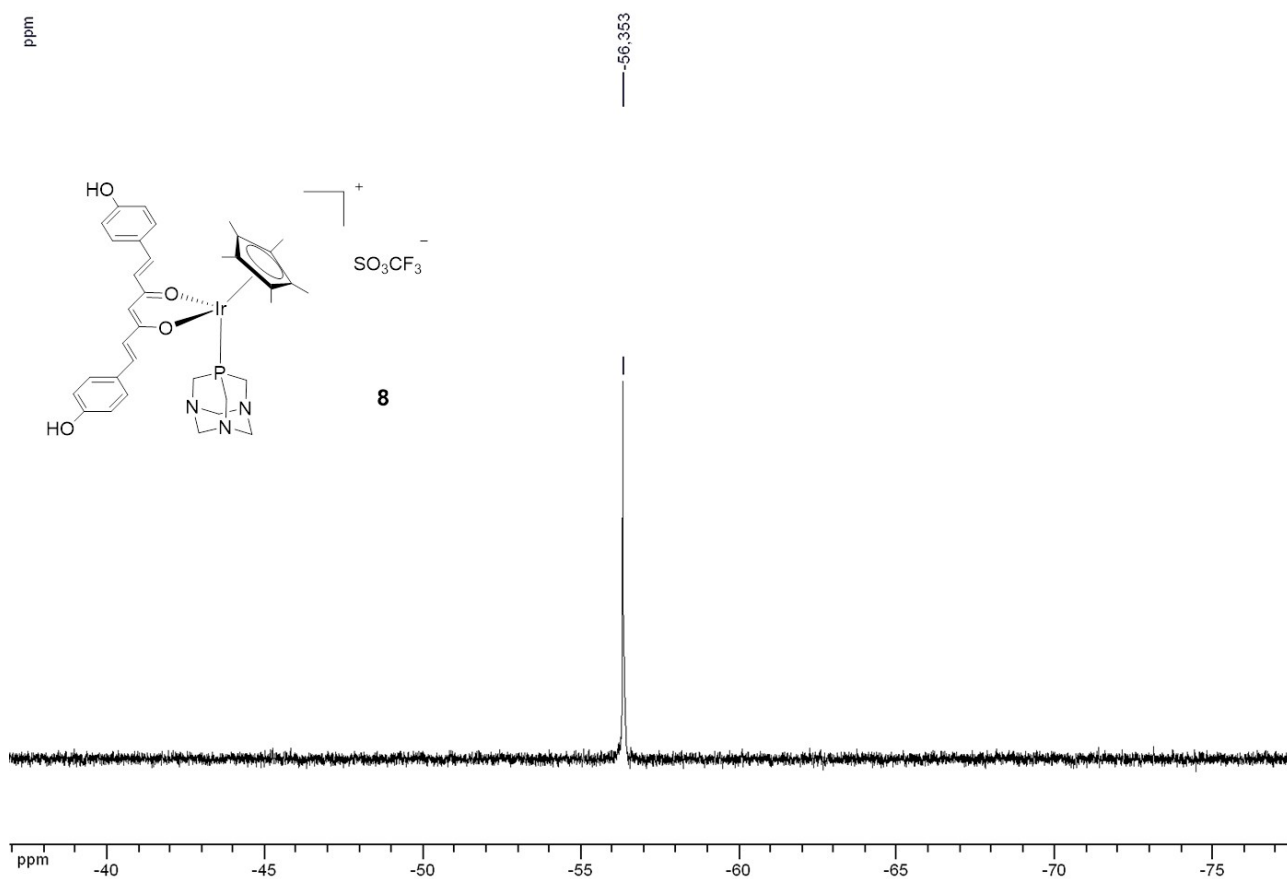

Supplement: c5dt03037d1.pdf [file c5dt03037d1.pdf]
